# Supplementary material
Source: Research Square preprint supplement (doi:10.21203/rs.3.rs-9201673/v1)
Supplement: Supplementary file 2 [file acefa51e700a145b7aca2f04.docx]

# Supplementary Materials(Method)

## Determination of soil physical and chemical properties and soil enzyme activities

Soil pH: determined by the potentiometric method using a pH meter (soil-to-water ratio 2.5:1). Soil moisture content: determined by the oven-drying method at 105 ℃. Soil total nitrogen: determined by the semi-micro Kjeldahl distillation method. Soil available nitrogen (alkali-hydrolyzable N): determined by the alkali hydrolysis diffusion method. Soil total phosphorus: determined by the H₂SO₄-HClO₄ digestion followed by molybdenum-antimony anti-spectrophotometry. Soil available phosphorus: determined by extraction with H₂SO₄-NaHCO₃ followed by molybdenum-antimony anti-spectrophotometry. Soil ammonium nitrogen (NH₄⁺-N): determined by ultraviolet spectrophotometry. Soil nitrate nitrogen (NO₃⁻-N): determined by ultraviolet spectrophotometry. Soil nitrite nitrogen (NO₂⁻-N): determined by ultraviolet spectrophotometry. Soil humus and organic matter contents: determined by the potassium dichromate oxidation-external heating method.

**Soil Urease Activity**

A 0.05 g soil sample was weighed and mixed with 25 μL toluene to fully moisten the soil. After incubation at room temperature for 15 min, 125 μL of 10% urea solution and 250 μL citrate buffer (pH 6.7) were added to the centrifuge tube. The mixture was shaken and incubated at 37 ℃ for 24 h, then centrifuged at 10,000×g for 10 min at room temperature, and the supernatant was collected.

A 72 μL aliquot of supernatant was transferred to a 96-well plate, followed by the addition of 24 μL sodium phenoxide and 24 μL sodium hypochlorite. After thorough mixing and incubation at room temperature for 20 min, 80 μL deionized water was added. The absorbance was measured at 630 nm. For the control, 0.05 g soil was treated with deionized water instead of urea solution, with all other procedures identical to those of the sample. A standard curve was prepared for quantification.

**Soil Nitrate Reductase Activity**

A 0.05 g soil sample was weighed, and 50 μL deionized water, 182.5 μL PBS buffer (pH 7.4), and 17.5 μL potassium nitrate solution were added sequentially. After mixing, the mixture was incubated at 37 ℃ for 24 h. After incubation, 25 μL saturated potassium aluminum sulfate solution was added and mixed immediately, followed by centrifugation at 8000×g for 5 min at room temperature. The supernatant was collected for analysis. An 80 μL aliquot of supernatant was placed in a 96-well plate, mixed with 20 μL PMS solution, and incubated in a water bath at 37 ℃ for 20 min. Then 50 μL p-aminobenzenesulfonic acid solution and 50 μL α-naphthylamine solution were added successively. After color development for 20 min, absorbance was measured at 520 nm. In the control, potassium nitrate was added after incubation; all other steps were the same as the sample. A standard curve was constructed for calculation.

**Soil Nitrite Reductase Activity**

Soil samples were sieved (10 mesh) on dry ice. A 0.05 g sample was weighed, and 100 μL 0.5% sodium nitrite solution and 100 μL 1% glucose solution were added. In the control, deionized water replaced 0.5% sodium nitrite solution.

The no-substrate control contained no soil, and the blank control contained no soil and used water instead of sodium nitrite solution; all other conditions were identical to the sample. After mixing, the mixture was incubated in a water bath at 25 ℃ for exactly 3 h. After reaction, 100 μL saturated potassium aluminum sulfate solution was added, vortexed for 30 s, and centrifuged at 8,000×g for 10 min at 4 ℃. The supernatant was collected. An 80 μL aliquot was transferred to a 96-well plate, followed by 80 μL 0.1% α-naphthylamine solution, 80 μL 0.5% p-aminobenzenesulfonic acid solution, and 60 μL deionized water. After mixing and incubation at room temperature for 15 min, absorbance was measured at 540 nm. A standard curve was prepared for quantification.

**Soil Phosphatase Activity**

Soil samples were sieved (10 mesh) on dry ice. Approximately 0.05 g fresh soil was weighed and mixed with 25 μL toluene. After full infiltration and gentle shaking for 15 min, 0.2 mL of 0.5% disodium phenyl phosphate was added (acetate buffer for acid phosphatase, citrate buffer for neutral phosphatase, and borate buffer for alkaline phosphatase). The mixture was shaken and incubated at 37 ℃ for 24 h. After incubation, 0.5 mL of 0.3% aluminum sulfate was added immediately to terminate the reaction. The mixture was centrifuged at 8,000 rpm for 10 min at 25 ℃, and the supernatant was placed on ice for analysis. For the assay: 10 μL supernatant, 20 μL borate buffer, and 4 μL 2,6-dibromoquinone-4-chloroimide reagent were mixed in a 96-well plate. After color development, 166 μL deionized water was added. After incubation at room temperature for 30 min, absorbance was measured at 660 nm.

Blank and standard tubes used 0.5% disodium phenyl phosphate or 0.5 μmol/mL phenol standard solution instead of supernatant, respectively. A standard curve was prepared for calculation.

**Soil Invertase (Sucrase) Activity**

A 0.05 g soil sample was weighed and mixed with 3 μL toluene, then incubated at 37 ℃ for 15 min. For the sample tube, 50 μL buffer (phosphate buffer for acidic condition, Tris-HCl buffer for neutral condition) and 150 μL sucrose solution were added. For the control tube, 0.05 g soil was treated with 3 μL toluene and incubated at 37 ℃ for 15 min, then mixed with 50 μL buffer and 150 μL deionized water. Both tubes were incubated at 37 ℃ for 24 h, then centrifuged at 10,000×g for 5 min at 4 ℃. An 80 μL aliquot of supernatant was mixed with 200 μL DNS reagent, heated in a boiling water bath for 5 min, cooled, and measured at 540 nm. A standard curve was constructed for quantification.

**Soil Peroxidase Activity**

A 0.05 g air-dried soil sample was weighed into a centrifuge tube, and 160 μL 1% pyrogallol solution and 40 μL 0.5% H₂O₂ solution were added (in the control, deionized water replaced pyrogallol). After shaking, the mixture was incubated in a water bath at 30 ℃ for 3 h. Then 80 μL 0.5 mol/L HCl and 500 μL diethyl ether were added, shaken several times, and left at room temperature for 30 min. A 200 μL aliquot of the upper layer was measured at 430 nm. A standard curve was prepared for calculation.

## Rhizosphere soil nontarget metabolomics and root targeted metabolomics analysis

Rhizosphere soil and plant root samples were first lyophilization treated. Precisely 50 mg of powder was weighed, and 1 mL pre-chilled extraction solvent (methanol:acetonitrile:water = 2:2:1, v/v) was added. After vortexing for 30 s, metabolites were extracted via liquid nitrogen-precooled steel balls, 45 Hz high-throughput grinding (10 min), and ice-bath sonication (10 min) for cell lysis. Then, proteins were precipitated at -20℃ for 1 h, followed by centrifugation at 12,000 rpm and 4℃ for 15 min. The supernatant was nitrogen-dried, reconstituted with 160 μL acetonitrile:water (1:1, v/v), and re-purified by sonication/centrifugation. Final supernatants and quality control (QC) pooled samples were analyzed.

Untargeted metabolomics was performed on a Waters Acquity I-Class PLUS UPLC-Xevo G2-XS QTOF MS (Acquity UPLC HSS T3 column), with gradient elution in positive/negative ESI modes and MSe-acquired MS1/MS2 data. Compounds were identified against multiple databases (parent/fragment ion deviations ≤100/50 ppm). Widely targeted metabolomics used a Waters Acquity I-Class PLUS UPLC-AB Sciex Qtrap 6500+MS (same column) with gradient elution at 40℃. Quantification was via MRM mode (optimized DP/CE), and qualification via the GB-PLANT database. Data were processed with isotope/adduct filtering, internal standard normalization, and retention time alignment (±0.2 min); signals with S/N < 10 were excluded.

## Isolation of microorganisms and laboratory experiments

**Common media**

**YM Medium**

Mannitol 10.0 g, NaCl 0.1 g, yeast extract 3.0 g, CaCl₂·6H₂O 0.05 g, K₂HPO₄ 0.33 g, MgSO₄ (anhydrous) 0.1 g, Congo red 0.01 g, agar 15.0 g, deionized water to 1.0 L, pH 7.0.

**LB medium**

Tryptone 10.0 g, yeast extract 5.0 g, NaCl 10.0 g, deionized water to 1.0 L, pH 7.0.

**Gauze’s medium No. 1**

Soluble starch 20.0 g, KNO₃ 1.0 g, NaCl 0.5 g, K₂HPO₄ 0.5 g, MgSO₄·7H₂O 0.5 g, FeSO₄ 0.01 g, deionized water to 1.0 L, pH 7.4.

***Streptomyces* enrichment medium**

Add 500.0 g rhizosphere soil to deionized water to a final volume of 2.0 L. Mix thoroughly and sterilize. After sterilization, let stand for 12 h, collect the supernatant and dilute 10‑fold. Add agar to a final concentration of 1.5%, re‑sterilize, and pour plates.

**PDA medium**

Potato infusion from 200.0 g potatoes, glucose 20.0 g, deionized water to 1.0 L.

**PDA spore‑supplemented plates**

Prepare *Fusarium* spore suspension: inoculate *Fusarium* onto PDA slants, incubate at 28 ℃ for 3 days. Scrape off spores, suspend in sterile deionized water, filter through sterile absorbent cotton, and count with a hemocytometer. Dilute to approximately 1×10⁷ CFU/mL. Add 8 mL of spore suspension to 100 mL melted PDA cooled to about 45 ℃, mix well, and pour plates.

**Organic phosphorus (lecithin) bacterial medium**

Glucose 10.0 g, (NH₄)₂SO₄ 0.5 g, NaCl 0.3 g, MgSO₄·7H₂O 0.3 g, FeSO₄ 0.03 g, MnSO₄ 0.03 g, KCl 0.3 g, CaCO₃ 1.0 g, lecithin 0.3 g (dissolved in 75% ethanol with heating, sterilized through a 0.22 μm filter), agar 20.0 g, deionized water to 1.0 L, pH 7.0. Lecithin was mixed with the medium cooled to 60 ℃ after autoclaving before pouring plates.

**Inorganic phosphorus (tricalcium phosphate) bacterial medium**

Glucose 10.0 g, (NH₄)₂SO₄ 0.5 g, NaCl 0.3 g, MgSO₄·7H₂O 0.3 g, FeSO₄ 0.03 g, MnSO₄ 0.03 g, CaCO₃ 5.0 g, KCl 0.3 g, Ca₃(PO₄)₂ 2.5 g, agar 20.0 g, deionized water to 1.0 L, pH 7.5.

**Potassium‑solubilizing test medium**

Glucose 5.0 g, MgSO₄ 0.5 g, FeCl₃ 0.005 g, CaCO₃ 0.1 g, Ca₃(PO₄)₂ 2.0 g, potassium feldspar 2.0 g, bromothymol blue 100.0 mg, agar 20.0 g, deionized water to 1.0 L, pH 7.2.

**CAS agar medium**

Chrome azurol S (CAS) 60.5 mg, hexadecyltrimethylammonium bromide (CTAB) 72.9 mg, FeCl₃·6H₂O 2.645 mg, NaH₂PO₄·2H₂O 295.25 mg, Na₂HPO₄·12H₂O 1213.5 mg, NH₄Cl 125 mg, KH₂PO₄ 37.5 mg, NaCl 62.5 mg, agar 9.0 g, deionized water to 1.0 L, pH 6.8.

**Isolation of Rhizosphere Soil Microorganisms**

Weigh 0.1 g of rhizosphere soil precisely into a cenrifuge tube, add 1 mL of LB liquid medium, shake thoroughly for 10 min, and then let it stand for 30 min. Take the supernatant and perfgradient dilutions with sterile deionized water to 10^-2, 10^-3, and 10^-4. Pipet0 μL of each dilution onto agar plates and incubate at 28℃ for 3 days.

**Isolation of Endophytic Bacteria**

Cut plant roots intoiate lengths, immerse in 75% ethanol for 2 min, then immerse in 0.9% sodium hypochlorite solution forn, and rinse with sterile deionized water 5 times. Grind the roots in a mortar for at least 10 min until fine, add an appropriate amount of sterilx thoroughly, and let it stand for 30 min. Take the supernatant and perform gradient dilutions to 10^-2,10^-3, and 10^-4. Pipette 100 μL of each dilution onto agar plates and incubate at 28℃ for 3days.

**Identification of Microorganisms**

Perform 16S rRNA or ITS2 sequence analysis on the isolated microorganisms using the primers described in Section PCR reaction system is 20 μL, including 10 μL of Taq DNA polymerase, 0.5 μL of each forward and reverseprimer, 2 μL of bacterial suspension, and 7 μL of deionized water. The reaction program is: 95℃ pre-denaturation f 3 min, 95℃ denaturation for 10 s, 55℃ annealing for 10 s, 72℃ extension for 1in (30 s for fungi), 30 cycles, followed by a final extension at 72℃ for 10 min, and holding at 4℃. The amplified DNA fragmere sequenced and subjected to BLAST alignment in the NCBI database (https://blast.ncbi.nlm.nih.gov/Blast.cgi), and the species of the microorganisms are determined based on tment results.

**Phosphate and potassium Solubilization test:** Pipof bacterial suspension onto Nautiyal organic phosphate medium, Nautiyal inorganic phosphate medium, and potassium solubilization test medium, respectively. The appearance of a transparent halo indicates the ability to solubilize phosphorus or potassium.

**IAA production Test:** Inoculate the strain into 50 mL of LB liquid medium containing L-tryptophan (100 mg/L). After incubation at 28℃ and 180 rpm for 1 day, pipette 50 μL of the bacterial suspension onto a white ceramic plate and add an equal volume of wski reagent (50 mL of 35% perchloric acid and 1 mL of 0.5 M ferric chloride). Mix thoroughly and incubate in he dark for 30 min; a red color indicates the presence of IAA.

**Siderophore production Test:** Spot 5 μL of the bacterial suspension onto CAS agar platand incubate at 28℃ for 3 days. The appearance of a yellow halo around the colony indicates siderophore production.

**Antagonism against *Fusarium solani* spore germination test:** Punch holes in prepared PDA plates containing spores using a cork borer. Add 100 μL of bacterial suspension into the holand incubate at 28℃ for 1 day to observe spore germination.

**Antagonism against *F. solani* mycelial growth test:** use a cork borer to obtain a mycelial plug from a *F. solani* plate and place it in the center of a PDA plate. of bacterial suspension at equal intervals 1 cm away from the mycelial plug. Incubate at 28℃ for 5 days and observe.

**Antagonism against *Ralstonia solanacearum* plate test:** Cultivate *R. solanacearum* in LB medium until the OD600 value reaches 0.6, and prepare the bacterial suspension in a spray bottle. Spot 10 μL of the test bacterial suspension onto YM agar plates and incubate a 28℃ for 12 h. Subsequently, spray the *R. solanacearum* suspension evenly onto the plates and incubate at 28℃ for 3 day to observe. F. solani and R. solanacearum isolated from *P. odoratum*.

**Phenolic acid tolerance assay:** Mineral salt medium (MSM) was prepared as follows: dipotassium hydrogen phosphate 5.8 g, ammonium sulfate 2.0 g, potassium dihydrogen phosphate 4.5 g, calcium chloride 0.02 g, magnesium chloride 0.16 g, ferric chloride 0.0018 g, sodium molybdate 0.0024 g, manganese chloride 0.0015 g, and agar 18.0 g, dissolved in deionized water to a final volume of 1.0 L, with pH adjusted to 7.0. Either p-coumaric acid, phloridzin, syringic acid, or ferulic acid was added separately to a final concentration of 0.5 g/L as the sole carbon source. A 5.0 µL aliquot of diluted bacterial suspension was inoculated onto the medium, followed by incubation at 28℃ for 7 days. Colony morphology was observed and recorded.

**Antagonistic assay among growth-promoting bacteria:** YM agar plates were prepared. A 50 μL aliquot of each bacterial suspension was spread evenly onto separate plates. Subsequently, 9 wells were punched into each agar plate. Excluding the pre-spread strain, 50 μL of each of the other bacterial strains was added into individual wells, with three replicate wells per strain. All plates were incubated at 28℃ for 1 day, and plate morphology was observed.

**Experiment on the effect of compounds on microbial growth:** Compound were added to 200 mL of LB liquid medium to a final concentration of 10 μg/mL, while the control gr received an equal volume of distilled water, with two replicates per treatment group. Subsequently, 2.0 mL of bacterial suspension with an OD600 value of 0.6 was added, and the cultures were incubated in Erlenmeyer flasks at 28℃ and 180 rpm. The OD600 he bacterial suspension was measured every 2 hours until the stationary phase. The concentration of Streptomyces was determined using the plate count method and the dry weight centrifuged bacterial pellets.

Preparation of SynCom

Each strain was inoculated into organic nutrient liquid medium (soluble starch 5.0 g, urea 2.0 g, KH₂PO₄ 6.0 g, yeast extract 10.0 g, MgSO₄ 1.0 g, soybean extract 10.0 g, beef extract 5.0 g, deionized water 1.0 L, pH 7.5) and incubated at 28 ℃ for 3–7 days. The OD₆₀₀ value of each culture was measured.

According to the OD₆₀₀ values, appropriate volumes of bacterial suspensions were collected and centrifuged at 4000×g for 20 min. After discarding the supernatant, the pellets were resuspended in tap water. The concentration of each strain was adjusted to OD₆₀₀ = 0.006 in a final volume of 500 mL. Based on a conversion that an OD₆₀₀ of 1.0 corresponds to 2×10⁹ CFU/mL, the viable cell count was 1.2×10⁷ CFU per 1.0 mL.

Field Experiment

The field experiment was conducted in a continuous cropping field of *P. odoratum* in Cili County, Hunan Province. The *P. odoratum* plants had been cultivated for one consecutive year under monocropping, and disease symptoms were observed on the rhizomes. The experiment was carried out in September 2024. Two plots with dimensions of 2.3 m × 2.0 m were established, designated as Group F1 (blank control) and Group F2 (microbial community treatment), respectively. The two plots were separated by 10 m, and each plot contained 30 *P. odoratum* plants. Plants in Group F2 were inoculated with the microbial inoculum using the same procedure as in the pot experiment, while plants in the control group (F1) were treated with tap water instead of bacterial suspension. The inoculation was applied three times, at 15, 30, and 45 days after the initial treatment, respectively. Observations were performed after the sprouting of *P. odoratum*.
